# Supplementary material
Source: PubMed Central journal article supplement (PMC1740310)
Supplement: oenvmed_59_7_498__1.pdf [file oenvmed_59_7_498__1.pdf]

## **Brisman: Bakers asthma**

### **50 references (web-only)**

1. Alderson MR. Mortality of millers and bakers. *Br J Cancer* 1987;**55**:695-696
2. Armentia A, Arranz M, Martin JM et al. Evaluation of immune complexes after immunotherapy with wheat flour in Bakers' asthma. *Ann Allergy* 1992;**69**:441-444.
3. Armentia A, Martin-Santos JM, Quintero A, Fernandez A, Barber D, Alonso E, Gil I. Bakers' asthma: prevalence and evaluation of immunotherapy with a wheat flour extract. *Ann Allergy* 1990;**65**:265-272.
4. Baagøe KH. Mehlidiosynkrasie als Ursache vasomotorischer Rhinitis und Asthma. *Acta Med Scand* 1933; LXXX: 4-6.
5. Baldo BA, Wrigley CW. IgE antibodies to wheat flour components. *Clin All* 1978;**8**:109-124.
6. Baldo BA, Krilis S, Wrigley CW. Hypersensitivity to Inhaled Flour Allergens. *Allergy* 1980;**35**:45-56.

7. Baldo BA, Baker RS. Inhalant Allergies to Fungi: Reactions to Bakers' Yeast (*Saccharomyces cerevisiae*) and identification of Bakers' Yeast Enolase as an Important Allergen. *Int Archs Allergy Appl Immun* 1988;**86**:201-208.
8. Baur X, Pau M, Czuppon A, Fruhmann G. Characterization of soybean allergens causing sensitization of occupationally exposed bakers. *Allergy* 1996;**51**:326-330.
9. Blands J, Diamont B, Kallós P et al. Flour allergy in bakers: Identification of allergenic fractions in flour and comparison of diagnostic methods. *Int Arch Allergy Appl Immunol* 1976;**52**:392-406.
10. Block G, Tse KS, Kijek K, Chan H, Chan-Yeung M. Baker's asthma, Clinical and Immunological studies. *Clin All* 1983;**13**:359-370.
11. Block G, Tse KS, Kijek K, Chan H, Chan-Yeung M. Baker's asthma: Studies of the cross-antigenicity between different cereal grains. *Clin All* 1984;**14**:177-185.
12. Burdorf A, Lillienberg L, Brisman J. Characterisation of exposure to inhalable flour dust in Swedish bakeries. *Ann Occup Hyg* 1994;**38**:67-78.
13. Burstyn I, Teschke K, Bartlett K, Kennedy SM. Determinants of wheat antigen and fungal alpha-amylase exposure in bakeries. *Am Ind Hyg Assoc J* 1998;**59**:313-320.

14. de Besche A. Serologische Untersuchungen über "Allergische Krankheiten" beim Menschen. *Acta path et microbiol Scand* 1929;**6**:115-144
15. DeMers MP, Orris P. Occupational exposure and asthma mortality. *JAMA* 1994;**272**: 1575.
16. De Zotti R, Larese F, Borenzi M, Negro C, Molinari S. Allergic airway disease in Italian bakers and pastry makers. *Occup Environ Med* 1994;**51**:548-52.
17. De Zotti R, Molinari S, Larese F, Borenzi M. Preemployment screening among trainee bakers. *Occup Environ Med* 1995;**52**: 279-83.
18. Frankland AW. Sitophilus sensitivity as a cause of baker's asthma. *Acta All* 1966;**22**:281.
19. Fränken J, Stephan U, Meyer HE, König W. Identification of Alpha-Amylase Inhibitor as a Major Allergen of Wheat Flour. *Int Arch Allergy Immunol* 1994;**104**:171-174.
20. Fränken J, Stephan U, Neuber K, Bujanowski-Weber J, Ulmer WT, König W. Characterization of Allergenic Components of Rye and Wheat Flour (*Secale*,

- Triticum vulgaris*) by Western Blot with Sera of Bakers: Their Effects on CD23 Expression. *Int Arch Allergy Appl Immunol* 1991;**96**:76-83.
21. Gadborg E. Om melallergi. Thesis 1956. Köpenhamn (In Danish).
22. Gorski P, Krakowiak A, Pazdrak K, Palczynski C, Ruta U, Walusiak J. Nasal challenge test in the diagnosis of allergic respiratory diseases in subjects occupationally exposed to a high molecular allergen (flour). *Occup Med* 1998;**48**:91-7.
23. Gordon S B, Curran A D, Murphy J, Sillitoe C, Lee G, Wiley K, Morice A H. Screening questionnaires for bakers' asthma – are they worth the effort? *Occup Med* 1997;**47**:361-366.
24. Hartmann AL, Berufsallergien bei Bäckern-Epidemiologie; Diagnose, Therapie und Prophylaxe; Versicherungsrecht. Dustri-Verlag Dr Karl Feistle, München-Deisenhofen 1986 (In German.)
25. Henrick DJ, Davies RJ, Pepys J. Bakers asthma. *Clin All* 1976;**6**:241-250
26. Herxheimer H. The skin sensitivity to flour of baker's apprentices. *Acta All* 1973;**28**:42-49.

27. Houba R, Heederik D, Doekes G, van Run PEM. Exposure sensitization Relationship for  $\alpha$ -Amylase Allergens in the Baking Industry. *Am J Respir Crit Care Med* 1996;**154**:130-6.
28. Jeffrey P, Griffin P, Gibson M, Curran AD. Small bakeries-a cross-sectional study of respiratory symptoms, sensitisation and dust exposure. *Occup Med* 1999;**49**:237-241.
29. Järvinen K, Piriälä V, Björkstén F, Keskinen H, Lethinen M, Stubb S. Unsuitability of bakery work for a person with atopy. *Ann All* 1979;**42**:3:192-95.
30. Klaustermeyer WB, Bardana EJ, Hale CF. Pulmonary hypersensitivity to *Alternaria* and *Aspergillus* in baker's asthma. *Clin All* 1977;**7**:227-233.
31. Lillienberg L, Brisman J. Flour Dust in Bakeries - a Comparison between Methods. *Ann of Occup Hyg* 1994;**30**:571-575.
32. Massin N, Bohadana AB, Wild P, Kolopp-Sarda MN, Toamin JP. Airway Responsiveness to Methacholine, Respiratory Symptoms, and Dust Exposure levels in Grain and Flour Mill. Workers in Eastern France. *Am J Ind Med* 1995;**27**:859-69.

33. Musk AW, Venables KM, Crook B, Nunn AJ, Hawkins R, Crook GDW, Graneek BJ, Tee RD, Farrer N, et al. Respiratory symptoms, lung function, and sensitisation to flour in a British bakery. *Br J Ind Med* 1989;**46**:636-642.
34. Nieuwenhuijsen MJ, Lawson D, Venables KM, Newman Taylor AJ. Flour dust exposure variability in flour mills and bakeries. *Ann Occup Hyg* 1995;**39**:299-305.
35. Nieuwenhuijsen MJ, Sandiford CP, Lawson D, et al. Dust and flour aeroallergen exposure in flour mills and bakeries. *Occup Environ Med* 1994;**51**:584-88.
36. Nieuwenhuijsen MJ, Lawson D, Venables KM, Newman Taylor AJ. Correlation between different measures of exposure in a cohort of bakery workers and flour millers. *Ann Occup Hyg* 1995;**39**:291-298.
37. Nieuwenhuijsen MJ, Heederik D, Doekes G, Venables KM, Newman Taylor AJ. Exposure-response relations of alpha-amylase sensitisation in British bakeries and flour mills. *Occup Environ Med* 1999;**56**:197-201
38. Pfeil T, Schwabl U, Ulmer WT, König W. Western Blot Analysis of Water-Soluble Wheat Flour (*Triticum vulgare*) Allergens. *Int Arch Allergy Appl Immunol* 1990;**91**:224-231

39. Prichard MG, Ryan G, Musk AW. Wheat flour sensitisation and airways disease in urban bakers. *Br J Ind Med* 1984;**41**:450-454.
40. Prichard MG, Ryan G, Walsh BJ, Musk AW. Skin test and RAST responses to wheat and common allergens and respiratory disease in bakers. *Clin All* 1985;**15**:203-210.
41. Ramazzini B. Diseases of bakers and millers. In: Wright WC, ed. *Disease of workers-De Morbis Artificium*. New York, USA: Hafner Publishing Company, Inc; 1713. p 225-235.
42. Salén EB, Juhlin-Dannfelt C. Über das Vorkommen von sogen. latenter Allergie. *Acta Med Scand* 1935;**86**:505-569.
43. Sandiford CP, Nieuwenhuijsen MJ, Tee RD, Newman Taylor AJ. Measurement of airborne proteins involved in Bakers' asthma. *Clin Exp Allergy* 1994;**24**:450-56
44. Sandiford CP, Nieuwenhuijsen MJ, Tee RD, Newman Taylor AJ. Determination of the size of airborne flour particles. *Allergy* 1994;**49**:891-893.
45. Tee RD, Gordon DJ, Gordon S, Crook B, Nunn AJ, et al. Immune response to flour and dust mites in a United Kingdom bakery. *Br J Ind Med* 1992;**49**:581-587.

46. Thiel H, Ulmer WT. Baker's Asthma: Development and Possibility for Treatment. *Chest* 1980;**78** suppl 2:400-405.
47. Tiikkainen U, Louhelainen K, Nordman H. Flour dust. The Nordic Expert Group for Criteria Documentation of Health Risks from Chemicals. *Arbete & Hälsa* 1996:27.
48. Valdivieso R, Subiza J, Subiza JL, Hinojosa M, de Carlos E, Subiza E. Bakers' asthma caused by alpha amylase. *Ann All* 1994;**73**:337-342.
49. Walsh BJ, Wrigley CW, Musk AW, Baldo BA. A comparison of the binding of IgE in the sera of patients with baker's asthma to soluble and insoluble wheat-grain proteins. *J Allergy Clin Immunol* 1985;**76**:23-8.
50. Vanhanen M, Tuomi T, Hokkanen H, Tupasela O, Tuomainen A, Holmberg PC, et al. Enzyme exposure and enzyme sensitisation in the baking industry. *Occup Environ Med* 1996;**53**:670-676.
